# Supplementary material for: Polymer immobilized tantalum(v)–amino acid complexes as selective and recyclable heterogeneous catalysts for oxidation of olefins and sulfides with aqueous H2O2
Source: Royal Society of Chemistry journal article supplement (doi:10.1039/c9nj04180j), 2019-01-01
Supplement: c9nj04180j1.pdf [file c9nj04180j1.pdf]

## Supplementary Information

For

### **Polymer immobilized Tantalum(V)-amino acid complexes as selective and recyclable heterogeneous catalysts for oxidation of olefins and sulfides with aqueous H<sub>2</sub>O<sub>2</sub>**

Gangutri Saikia, Kabirun Ahmed, Chandrasee Rajkhowa, Mitu Sharma, Hiya Talukdar and  
Nashreen S. Islam\*

Department of Chemical Sciences, Tezpur University, Tezpur 784028, Assam, India.

\*To whom correspondence should be addressed:

Fax: +91-3712-267006

E-mail: [nsi@tezu.ernet.in](mailto:nsi@tezu.ernet.in)

[nashreen.islam@rediffmail.com](mailto:nashreen.islam@rediffmail.com)

Address: Prof. Nashreen S. Islam  
Dept. of Chemical Sciences  
Tezpur University  
Napaam, Tezpur-784028  
Assam, India

Phone : +91-9435380222 (Off.)  
+91-3712-267007

Table S1: Analytical data of the complexes **1** and **2**

| Compound          | % found from element analysis<br>(% obtained from EDX spectra) |      |                |         |        |        |        | % O <sub>2</sub> <sup>2-</sup> | Ta:O <sub>2</sub> <sup>2-</sup> | Metal loading <sup>a</sup><br>(mmolg <sup>-1</sup> ) |
|-------------------|----------------------------------------------------------------|------|----------------|---------|--------|--------|--------|--------------------------------|---------------------------------|------------------------------------------------------|
|                   | C                                                              | H    | N              | O       | Na     | Cl     | Ta     |                                |                                 |                                                      |
| <b>MRAsn</b>      | 77.96<br>(77.31)                                               | 7.18 | 6.98<br>(7.02) | (15.67) |        |        |        |                                |                                 |                                                      |
| <b>Catalyst 1</b> | 67.27<br>(67.01)                                               | 6.33 | 6.37<br>(6.28) | (19.25) | (0.80) |        | (6.66) | 2.4                            | 1:2                             | 0.37                                                 |
| <b>MRArg</b>      | 76.59<br>(76.80)                                               | 7.0  | 9.67<br>(9.88) | (12.04) |        |        | (1.28) |                                |                                 |                                                      |
| <b>Catalyst 2</b> | 65.90<br>(65.51)                                               | 6.16 | 8.89<br>(8.71) | (18.51) | (1.09) | (0.30) | (5.88) | 2.3                            | 1:2                             | 0.32                                                 |

$${}^a \text{Metal loading} = \frac{\text{Observed metal \%} \times 10}{\text{Atomic weight of metal}}$$

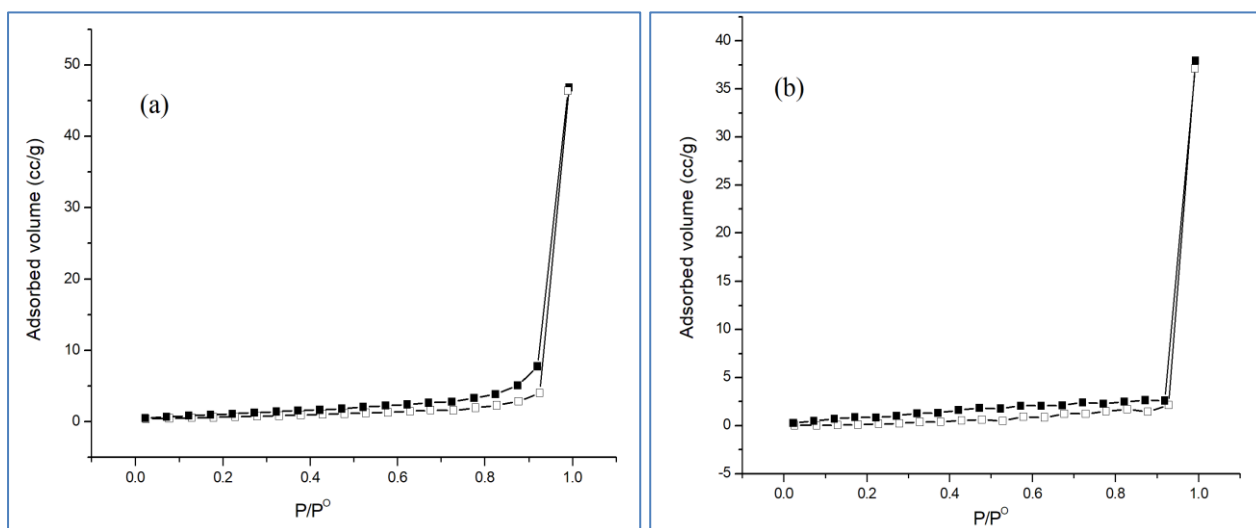

Fig. S1 Adsorption/desorption isotherm of complexes (a) **1** and (b) **2**

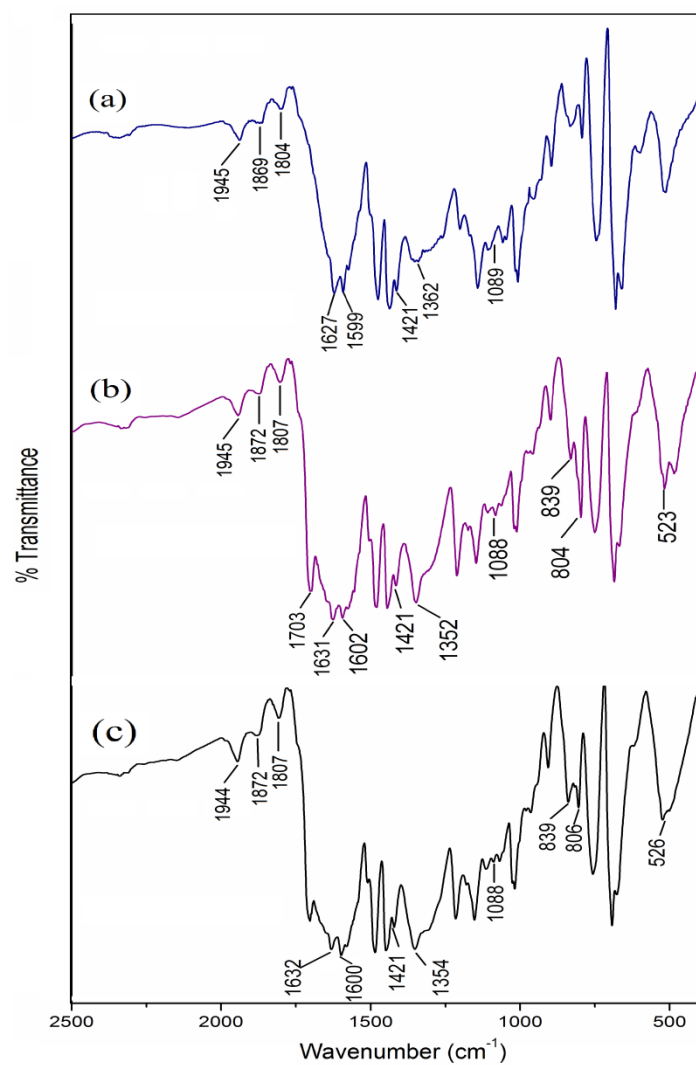

Fig. S2 IR spectra of (a) **MRArg**, (b) **catalyst 2** and (c) **catalyst 2** after 5<sup>th</sup> cycle of reaction.

Table S2: Infrared (IR) and Raman (R) spectral data for the polymer support, amino acid linked Merrifield resin and polymer immobilized peroxotantalates<sup>a</sup>

| Assignments                                                   |      | MR      | MRAsn    | Catalyst 1    | MRArg    | Catalyst 2    |
|---------------------------------------------------------------|------|---------|----------|---------------|----------|---------------|
| v(C-Cl)                                                       | (IR) | 1264(m) | -        | -             | -        | -             |
|                                                               | (R)  | 1263(m) |          |               |          |               |
| v(C=O, amide I)                                               | (IR) |         | 1629(s)  | 1630(s)       |          |               |
|                                                               | (R)  |         | 1621(m)  | 1624(m)       |          |               |
| v <sub>s</sub> (CN <sub>3</sub> H <sub>5</sub> <sup>+</sup> ) | (IR) |         |          |               | 1627(s)  | 1631(s)       |
|                                                               | (R)  |         |          |               | 1622(m)  | 1624(m)       |
| v <sub>as</sub> (COO)                                         | (IR) |         | 1598(s)  | 1601(s)       | 1599(s)  | 1602(s)       |
|                                                               | (R)  |         | 1597(sh) | 1599(sh)      | 1596(sh) | 1600(sh)      |
| v <sub>s</sub> (COO)                                          | (IR) |         | 1422(sh) | 1353(s)       | 1421(sh) | 1352(s)       |
|                                                               | (R)  |         | 1461(m)  | 1362(m)       | 1466(m)  | 1385(s)       |
| v(C-N)                                                        | (IR) |         | 1085(vw) | 1088(vw)      | 1089(vw) | 1088(vw)      |
|                                                               | (R)  |         | 1091(vw) | 1090(vw)      | 1091(vw) | 1088(vw)      |
| v(O-O)                                                        | (IR) |         |          | 805(s),839(m) |          | 804(s),839(m) |
|                                                               | (R)  |         |          | 819(m),855(m) |          | 821(m),858(m) |
| v <sub>as</sub> (M-O <sub>2</sub> )                           | (IR) |         |          | 526(m)        |          | 523(m)        |
|                                                               | (R)  |         |          | 571(m)        |          | 575(m)        |
| v <sub>s</sub> (M-O <sub>2</sub> )                            | (IR) |         |          | -             |          | -             |
|                                                               | (R)  |         |          | 550(sh)       |          | 550(sh)       |

<sup>a</sup>s, strong; m, medium; vw, very weak; sh, shoulder.

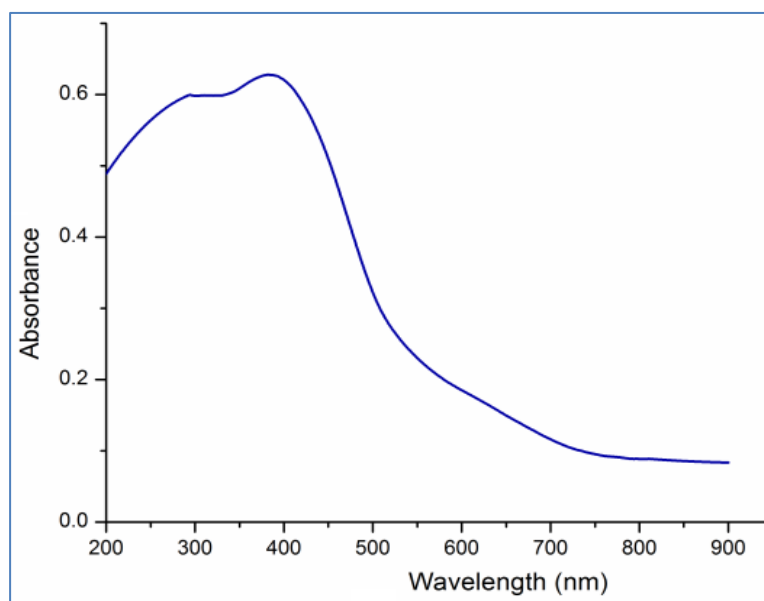

Fig. S3 Diffuse reflectance UV-visible spectra of Catalyst **1**.

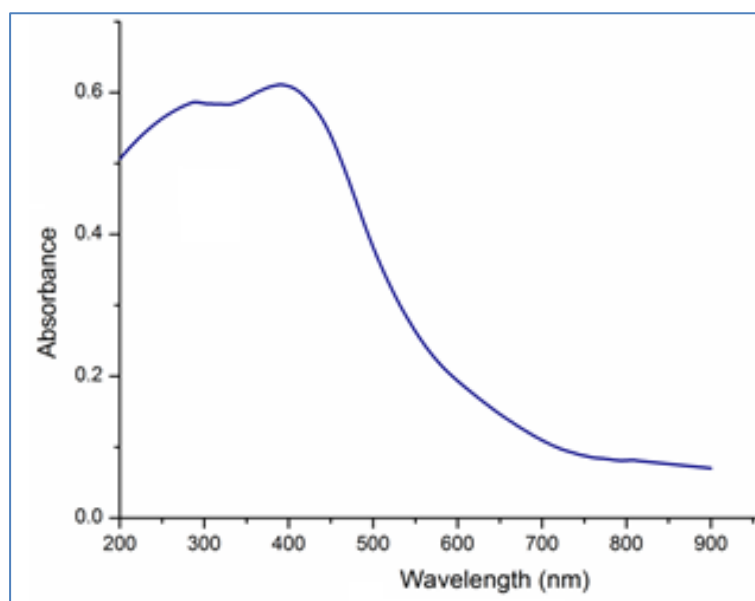

Fig. S4 Diffuse reflectance UV-visible spectra of Catalyst **2**.

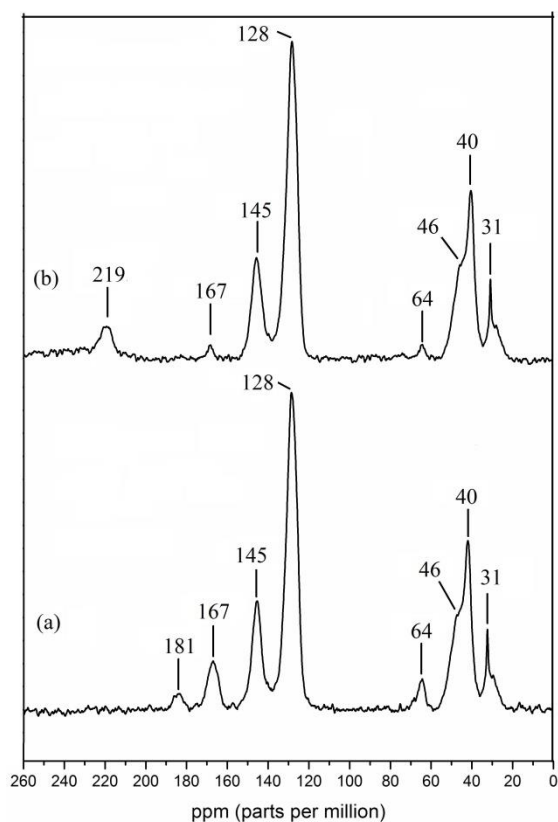

Fig. S5 Solid state  $^{13}\text{C}$  NMR spectra of (a) **MRArg** and (b) **Catalyst 2**

Table S3  $^{13}\text{C}$  NMR chemical shifts for **MR**, amino acid linked **MR** and polymer bound catalysts **1** and **2**

| Compound                | Chemical shift (ppm)              |                                   |                                 |                        |            |                            |                     |           |
|-------------------------|-----------------------------------|-----------------------------------|---------------------------------|------------------------|------------|----------------------------|---------------------|-----------|
|                         | Merrifield resin                  |                                   |                                 |                        | Amino acid |                            |                     |           |
|                         | Quaternary<br>Aromatic<br>Carbons | Protonated<br>Aromatic<br>Carbons | Aliphatic<br>Methine<br>Carbons | $\text{CH}_2\text{Cl}$ | C-NH       | C=NH/<br>CONH <sub>2</sub> | Carboxylate<br>Free | Complexed |
| <b>MR</b>               | 145.18                            | 128.36                            | 41.04                           | 46.17                  | --         | --                         | --                  | --        |
| <b>MRA<sub>sn</sub></b> | 145.16                            | 128.96                            | 40.45                           | --                     | 64.44      | 179.89                     | 181.59              | --        |
| <b>Catalyst 1</b>       | 145.52                            | 128.14                            | 40.81                           | --                     | 64.57      | 179.94                     | -                   | 219.89    |
| <b>MRArg</b>            | 145.82                            | 128.35                            | 40.35                           | 46.24                  | 64.79      | 167.59                     | 181.03              | --        |
| <b>Catalyst 2</b>       | 145.52                            | 128.59                            | 40.55                           | 46.44                  | 64.57      | 167.46                     | --                  | 219.96    |

Table S4: TGA data for amino acid functionalized MR and polymer bound pTa catalysts.

| Compound          | Temperature range (°C) | Observed weight loss (%) | Final residue(%) |
|-------------------|------------------------|--------------------------|------------------|
| <b>MRAsn</b>      | 35-95                  | 3.5                      | 13.1             |
|                   | 148-257                | 12.5                     |                  |
|                   | 263-698                | 70.9                     |                  |
| <b>Catalyst 1</b> | 35-92                  | 2.8                      | 26.1             |
|                   | 104-146                | 2.5                      |                  |
|                   | 147-299                | 8.7                      |                  |
|                   | 302-699                | 59.9                     |                  |
| <b>MRArg</b>      | 40-95                  | 1.7                      | 13.9             |
|                   | 155-239                | 9.4                      |                  |
|                   | 264-698                | 75.0                     |                  |
| <b>Catalyst 2</b> | 35-98                  | 2.7                      | 24.9             |
|                   | 104-145                | 2.4                      |                  |
|                   | 150-291                | 8.4                      |                  |
|                   | 293-699                | 61.6                     |                  |

Table S5: Optimization of reaction conditions for catalyst **1** catalyzed selective oxidation of methyl phenyl sulfide (MPS) to sulfoxide by 30% H<sub>2</sub>O<sub>2</sub><sup>a</sup>

Cc1ccccc1S  $\xrightarrow[\text{Solvent}]{\text{Catalyst 1, 30\% H}_2\text{O}_2}$  Cc1ccccc1S(=O) + Cc1ccccc1S(=O)(=O)

1
1a
1b

| Entry           | Molar ratio<br>(Ta:MPS) | H <sub>2</sub> O <sub>2</sub><br>(equiv.) | Solvent            | Time<br>(min) | Isolated<br>yield | 1a:1b        | TON <sup>b</sup> | TOF <sup>c</sup><br>(h <sup>-1</sup> ) |
|-----------------|-------------------------|-------------------------------------------|--------------------|---------------|-------------------|--------------|------------------|----------------------------------------|
| 1               | 1:1000                  | 2                                         | -                  | 95            | 95                | 78:22        | 950              | 601                                    |
| 2               | 1:1000                  | 2                                         | H <sub>2</sub> O   | 180           | 56                | 54:46        | 560              | 187                                    |
| 3               | 1:1000                  | 2                                         | CH <sub>3</sub> CN | 180           | 82                | 92:8         | 820              | 273                                    |
| 4               | 1:1000                  | 2                                         | EtOH               | 180           | 89                | 96:4         | 890              | 297                                    |
| 5               | 1:1000                  | 2                                         | MeOH               | 160           | 98                | 100:0        | 980              | 367                                    |
| 6               | 1:1000                  | 1                                         | MeOH               | 180           | 87                | 100:0        | 870              | 290                                    |
| 7               | 1:1000                  | 3                                         | MeOH               | 100           | 97                | 100:0        | 970              | 581                                    |
| <b>8</b>        | <b>1:1000</b>           | <b>4</b>                                  | <b>MeOH</b>        | <b>40</b>     | <b>97</b>         | <b>100:0</b> | <b>970</b>       | <b>1447</b>                            |
| 9               | 1:1500                  | 4                                         | MeOH               | 140           | 98                | 100:0        | 1484             | 637                                    |
| 10              | 1:2000                  | 4                                         | MeOH               | 180           | 96                | 100:0        | 1920             | 640                                    |
| 11              | 1:500                   | 4                                         | MeOH               | 25            | 95                | 61:39        | 475              | 1130                                   |
| 12 <sup>d</sup> | -                       | 4                                         | MeOH               | 40            | 14                | 59:41        | -                | -                                      |
| 13 <sup>e</sup> | 1:1000                  | 4                                         | MeOH               | 40            | 38                | 68:32        | 380              | 567                                    |
| 14 <sup>f</sup> | 1:1000                  | 4                                         | MeOH               | 20            | 98                | 69:31        | 980              | 2969                                   |

<sup>a</sup>Reactions were carried out with 5 mmol of substrate, 30 % H<sub>2</sub>O<sub>2</sub> in 5 mL of solvent at room temperature. Catalyst (13.5 mg for 0.005 Ta). <sup>b</sup>TON (turn over number)= mmol of product per mmol of catalyst. <sup>c</sup>TOF(turn over frequency)= mmol of product per mmol of catalyst per hour. <sup>d</sup>Blank experiment without any catalyst. <sup>e</sup>Using Na<sub>3</sub>[Ta(O<sub>2</sub>)<sub>4</sub>]·H<sub>2</sub>O as catalyst (2.0 mg, 0.005 mmol Ta). <sup>f</sup>Reaction conducted at 60 °C under optimum condition. Values in bold signify optimized reaction condition.



Table S6: Comparison of catalytic performance between complexes **1** and **2**(this work) and literature reported Ta-based catalysts for sulfide oxidation using H<sub>2</sub>O<sub>2</sub> as oxidant

| Entry | Catalyst                                                                | Catalyst amount | Conditions [Time, Temperature, Solvent] | Conversion /Sulfoxide Selectivity (%) | TON/ TOF(h <sup>-1</sup> ) | Reusability           | Ref.      |
|-------|-------------------------------------------------------------------------|-----------------|-----------------------------------------|---------------------------------------|----------------------------|-----------------------|-----------|
| 1     | [Ta(O <sub>2</sub> ) <sub>2</sub> (Asn) <sub>2</sub> ] <sup>-</sup> -MR | 0.002 mmol      | 40 min, RT, MeOH                        | 100/100                               | 970/1447                   | 5 <sup>th</sup> cycle | This work |
| 2     | [Ta(O <sub>2</sub> ) <sub>2</sub> (Arg) <sub>2</sub> ] <sup>-</sup> -MR | 0.002 mmol      | 70 min, RT, MeOH                        | 100/100                               | 950/812                    | 5 <sup>th</sup> cycle | This work |
| 3     | TaCl <sub>5</sub>                                                       | 0.02 equiv.     | 2.5 h, RT, CH <sub>3</sub> CN           | 100/95                                | --                         | --                    | 14a       |
| 4     | TaC                                                                     | 0.02 equiv.     | 1.25 h, 45 °C, CH <sub>3</sub> OH       | 100/99                                | --                         | 4 <sup>th</sup> cycle | 54        |
| 5     | Modified Ta-MCM with DET or DIPT                                        | 0.012 mmol      | 24 h, RT, CH <sub>3</sub> OH            | 60-80/>80                             | --/1-2.5                   | 2 <sup>nd</sup> cycle | 6b        |

**Text S1:** Calculations of efficiency of hydrogen peroxide in the sulfoxidation reaction systems

The calculations are shown with oxidation of styrene and methyl phenyl sulfide (MPS) to styrene oxide and methyl phenyl sulfoxide, respectively with catalyst **1** as a representative example.

**H<sub>2</sub>O<sub>2</sub> efficiency (%) = 100 × [mole of H<sub>2</sub>O<sub>2</sub> consumed in the formation of oxyfunctionalized products / mole of H<sub>2</sub>O<sub>2</sub> converted]**

(a) Assuming that one mole of oxidant reacts with one mole of substrate.

(b) The spent catalyst was separated from the reaction mixture simply by centrifugation. The H<sub>2</sub>O<sub>2</sub> left was estimated by titration with standard cerium (IV) solution.

### **1. In styrene oxidation**

H<sub>2</sub>O<sub>2</sub> (mole) consumed in the formation of styrene oxide (yield: 99.4 %) from 5 mmol styrene = **4.97 mmol**.

The titrated value was found to be: **4.34 mmol**

Since 10 mmol H<sub>2</sub>O<sub>2</sub> has been originally used for the reaction.

Therefore, total mole of H<sub>2</sub>O<sub>2</sub> converted = (10-4.34) mmol = 5.66 mmol

Thus, **H<sub>2</sub>O<sub>2</sub> efficiency = 100 × [4.97/5.66]**

**= 87.8%**

### **2. In sulfide oxidation**

H<sub>2</sub>O<sub>2</sub> (mole) consumed in the formation of sulfoxide (yield: 97%) from 5 mmol sulfides = **4.85 mmol**.

The titrated value was found to be: **14.98 mmol**

Since 20 mmol H<sub>2</sub>O<sub>2</sub> has been originally used for the reaction.

Therefore, total mole of H<sub>2</sub>O<sub>2</sub> converted = (20-14.98) mmol = 5.02 mmol

Thus, **H<sub>2</sub>O<sub>2</sub> efficiency = 100 × [4.85/5.02]**

**= 96.6%**

## Text S2: Characterization of Sulfoxides:

- (1) **Methylphenylsulfoxide:** Isolated as light yellow solid; mp 28-29°C;  $\nu$  (KBr)/cm<sup>-1</sup> 1048;  
<sup>1</sup>H NMR (400MHz; CDCl<sub>3</sub>,  $\delta$ ): 2.75(s, 3H); 7.31-7.36(m, 1H); 7.42-7.47(m, 2H); 7.61-7.68(m, 2H)  
<sup>13</sup>C NMR (100.5MHz; CDCl<sub>3</sub>,  $\delta$ ): 43.87; 123.54; 129.12; 131.02; 145.42
- (2) **Dimethylsulfoxide:** Isolated as liquid;  $\nu$  (KBr)/cm<sup>-1</sup> 1055;  
<sup>1</sup>H NMR (400MHz; CDCl<sub>3</sub>,  $\delta$ ): 2.65(s, 6H)  
<sup>13</sup>C NMR (100.5MHz; CDCl<sub>3</sub>,  $\delta$ ): 40.54
- (3) **Dibutylsulfoxide:** Isolated as white solid; mp 32-33°C;  $\nu$  (KBr)/cm<sup>-1</sup> 1063;  
<sup>1</sup>H NMR (400MHz; CDCl<sub>3</sub>,  $\delta$ ): 0.98(t, 6H, J=7.41Hz); 1.39-1.50(m, 4H); 1.66-1.78(m, 4H);  
2.62-2.69(m, 4H)  
<sup>13</sup>C NMR (100.5MHz; CDCl<sub>3</sub>,  $\delta$ ): 13.44; 22.17; 24.54; 51.91
- (4) **Ethylphenylsulfoxide:** Isolated as pale yellow liquid;  $\nu$  (KBr)/cm<sup>-1</sup> 1055;  
<sup>1</sup>H NMR (400MHz; CDCl<sub>3</sub>,  $\delta$ ): 1.25(t, 3H, J=6.61Hz); 2.70-2.79(q, 1H, J=6.58Hz); 2.93(q, 1H,  
J=6.61Hz) 7.13-7.48(m, 3H); 7.50-7.84(m, 2H)  
<sup>13</sup>C NMR (100.5MHz; CDCl<sub>3</sub>,  $\delta$ ): 10.41, 47.19, 125.44, 129.88, 131.47, 145.69
- (5) **Methyl-p-tolylsulfoxide:** Isolated as pale yellow liquid; mp 42-45 °C;  $\nu$  (KBr)/cm<sup>-1</sup> 1036  
<sup>1</sup>H NMR (400MHz; CDCl<sub>3</sub>,  $\delta$ ): 7.55 (d, 2H), 7.36 (d, 2H), 2.71 (s, 3H), 2.42 (s, 3H)  
<sup>13</sup>C NMR (100.5MHz; CDCl<sub>3</sub>,  $\delta$ ): 142.60, 141.57, 129.93, 123.59, 44.11, 21.41
- (6) **2-Phenylthio ethanol:** Isolated as light brown solid; mp 42-43°C;  $\nu$  (KBr)/cm<sup>-1</sup> 1041;  
<sup>1</sup>H NMR (400MHz; CDCl<sub>3</sub>,  $\delta$ ): 2.47(s, 1H); 3.13(t, 2H, J=5.31Hz); 3.77(t, 2H, J=5.26Hz);  
7.29-7.39(m, 1H); 7.48-7.57(m, 2H); 7.64-7.68(m, 2H)  
<sup>13</sup>C NMR (100.5MHz; CDCl<sub>3</sub>,  $\delta$ ): 56.18; 61.06; 125.47; 129.98; 131.53; 144.55
- (7) **Allylphenylsulfoxide:** Isolated as pale yellow liquid;  $\nu$  (KBr)/cm<sup>-1</sup> 1045;  
<sup>1</sup>H NMR (400MHz; CDCl<sub>3</sub>,  $\delta$ ): 3.33(dt, 2H, J=7.11, 1.12Hz); 5.06(dq, 1H, J=1.43, 17.10Hz);  
5.18(dq, 1H, J=1.12, 10.22Hz); 5.44(ddt, 1H, J=7.11, 10.22, 17.10 Hz); 7.26-7.31(m, 1H);  
7.36-7.39(m, 2H); 7.61-7.64(m, 2H)  
<sup>13</sup>C NMR (100.5MHz; CDCl<sub>3</sub>,  $\delta$ ): 60.38; 117.83; 124.71; 125.13; 129.06; 131.24; 145.13
- (8) **Diphenyl sulfoxide:** Isolated as white solid; mp 70 °C;  $\nu$  (KBr)/cm<sup>-1</sup> 1043;  
<sup>1</sup>H NMR(400MHz; CDCl<sub>3</sub>,  $\delta$ ): 7.61-7.68(m, 4H), 7.42-7.53(m, 6H)  
<sup>13</sup>C NMR (100.5MHz; CDCl<sub>3</sub>,  $\delta$ ): 144.84, 129.78, 128.13, 123.72  
Splitting patterns are designated as s (singlet), d (doublet), t (triplet), dt (double triplet), ddt (double-double triplet), q (quartet), dq (double quartet), m (multiplet).
